# Supplementary material for: Flexible polymer memory devices derived from triphenylamine–pyrene containing donor–acceptor polyimides
Source: Royal Society of Chemistry journal article supplement (doi:10.1039/c2jm33852a), 2012-01-01
Supplement: c2jm33852a.pdf [file c2jm33852a.pdf]

## Electronic Supplementary Information

### Flexible polymer memory devices derived from triphenylamine-pyrene containing donor-acceptor polyimides

An-Dih Yu,<sup>‡ab</sup> Tadanori Kurosawa,<sup>‡c</sup> Yi-Cang Lai,<sup>d</sup> Tomoya Higashihara,<sup>c</sup> Mitsuru Ueda,<sup>\*c</sup>  
Cheng-Liang Liu,<sup>\*e</sup> and Wen-Chang Chen<sup>\*ad</sup>

<sup>a</sup> Department of Chemical Engineering, National Taiwan University, Taipei, 10617 Taiwan.  
E-mail: chenwc@ntu.edu.tw

<sup>b</sup> Department of Organic Device Engineering and Research Center for Organic Electronics,  
Yamagata University, Yonezawa, Yamagata 992-8510, Japan.

<sup>c</sup> Department of Organic and Polymeric Materials, Tokyo Institute of Technology, 2-12-1  
Ookayama, Meguro-ku, Tokyo 152-8552, Japan. E-mail: ueda.m.ad@m.titech.ac.jp

<sup>d</sup> Institute of Polymer Science and Engineering, National Taiwan University, Taipei, 10617 Taiwan.

<sup>e</sup> Department of Chemical and Materials Engineering, National Central University, Taoyuan,  
32001 Taiwan. E-mail: clliu@ncu.edu.tw

<sup>‡</sup> The first two authors contributed equally to this paper

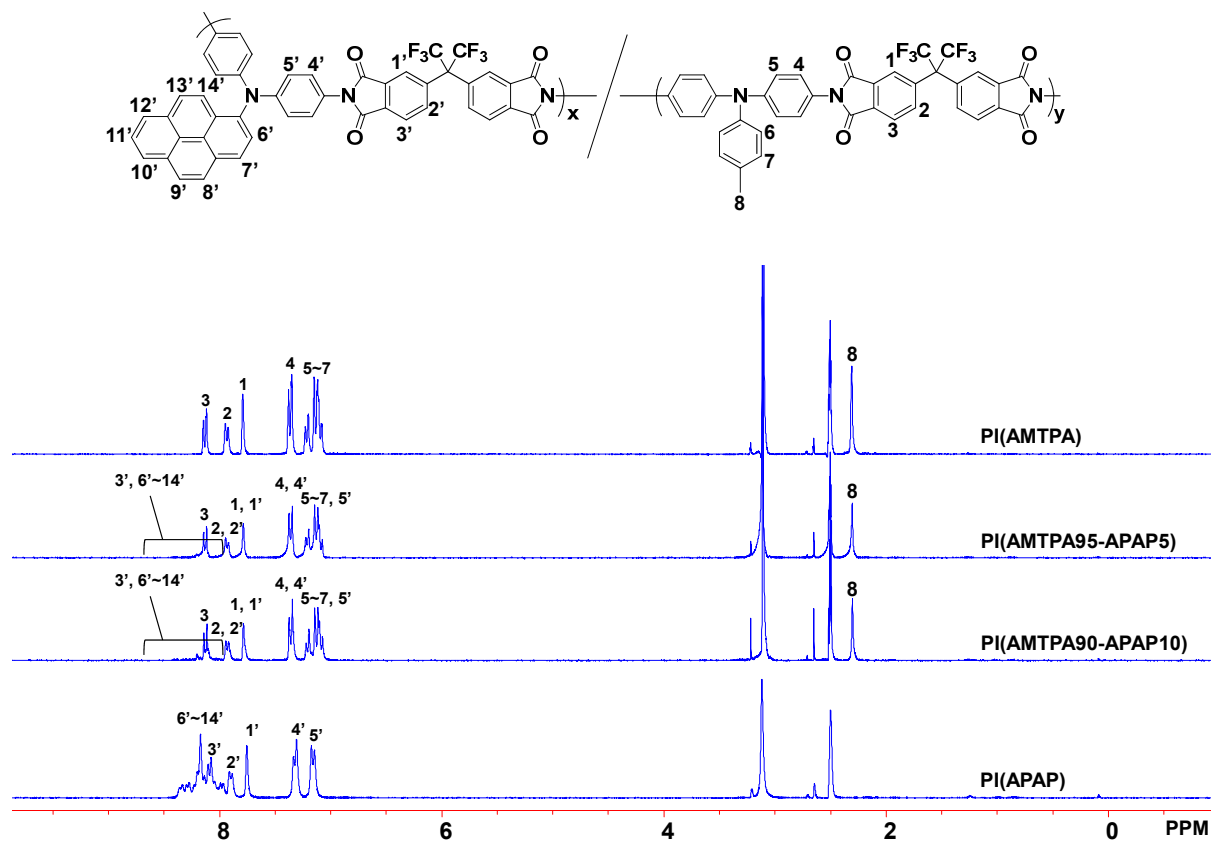

Fig. S1  $^1\text{H}$  NMR spectra of synthesized copolymers.

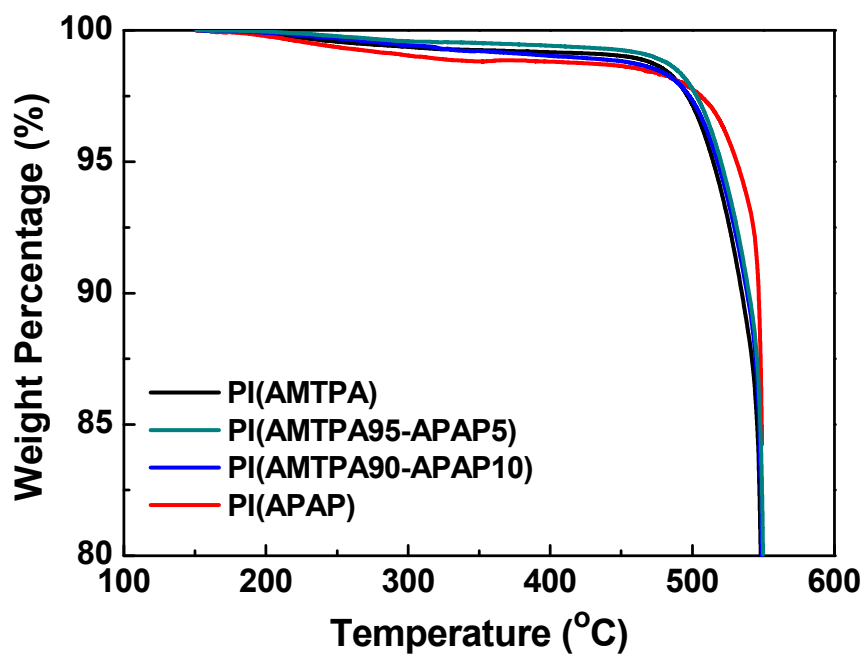

Fig. S2 TGA curves of synthesized coPIs.

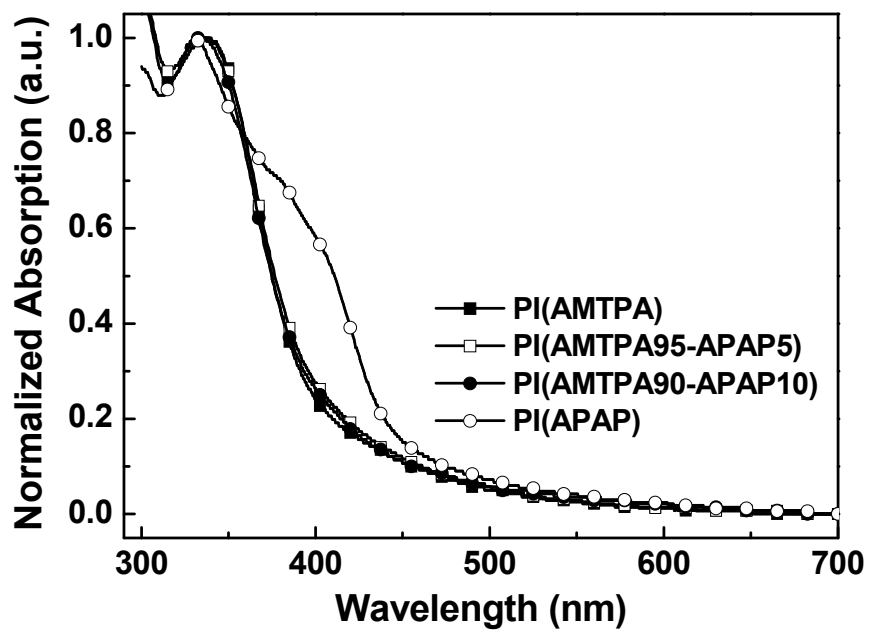

Fig. S3 Optical absorption spectra of synthesized coPIs thin films.

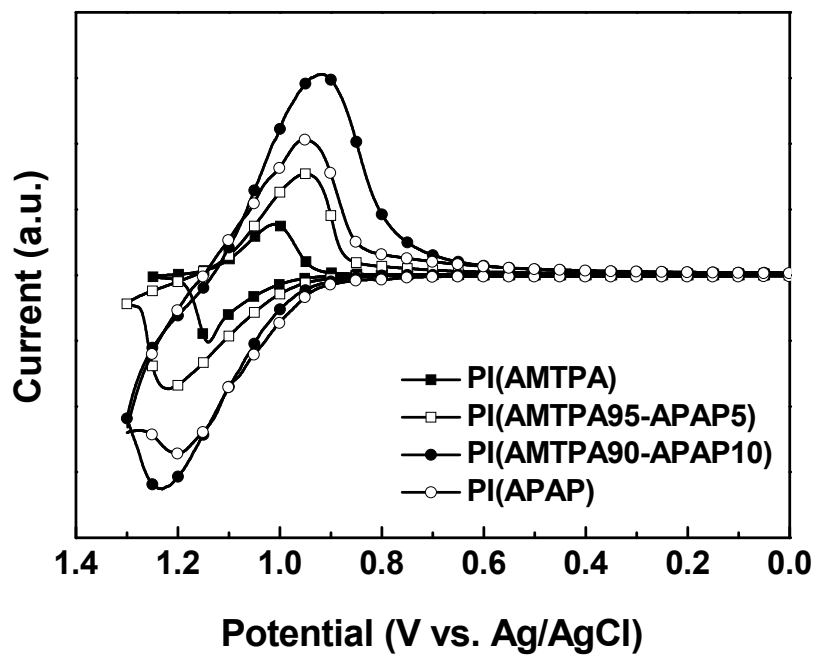

Fig. S4 CV of synthesized coPIs.

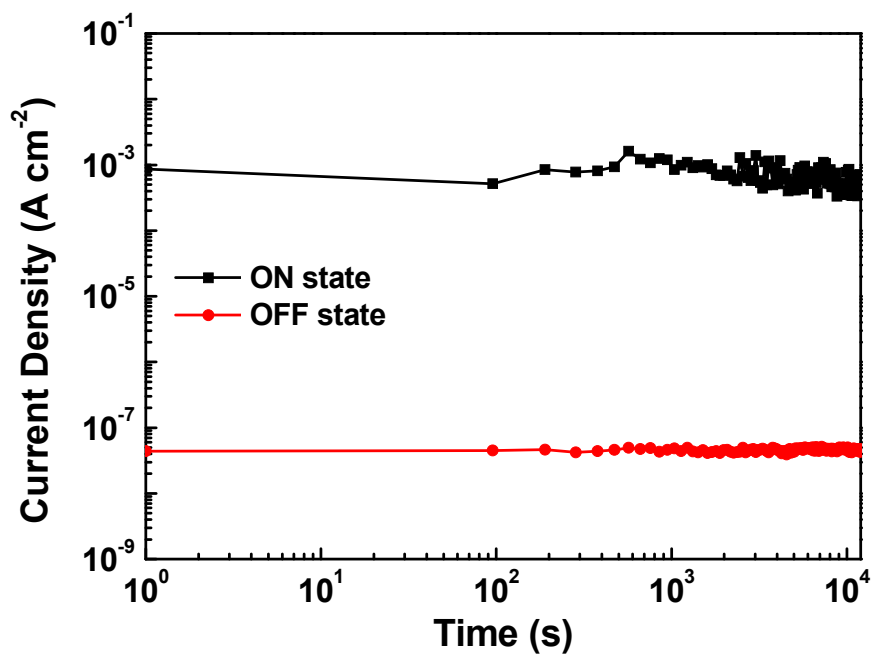

Fig. S5 Retention time test of flat PI(APAP) device.

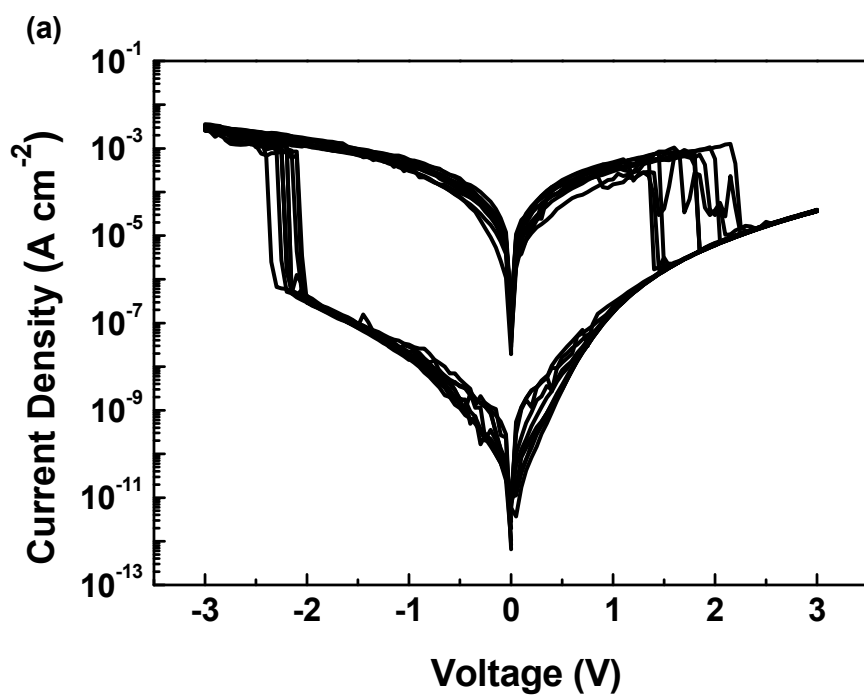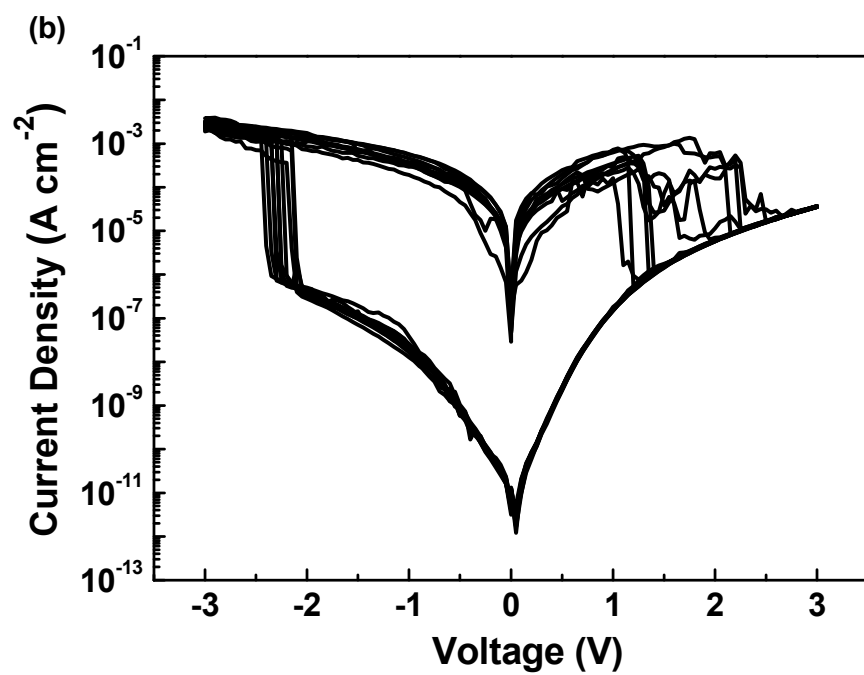

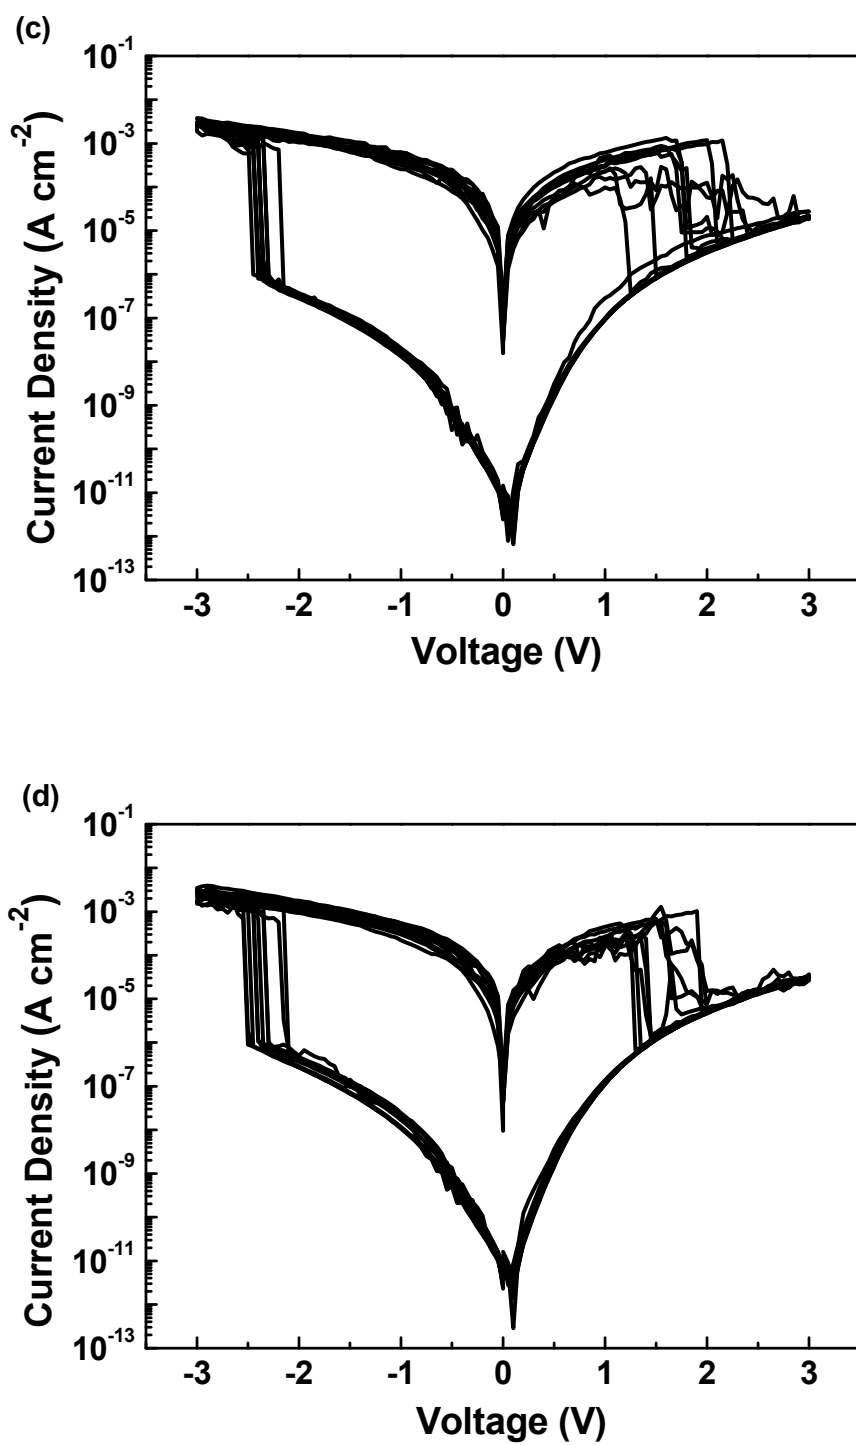

**Fig. S6** Current density-voltage ( $J$ - $V$ ) characteristic of flexible PI(AMTPA95-APAP5) memory device under bending radius of curvature of (a) 30 mm, (b) 20 mm, (c) 10 mm, and (d) 5 mm.



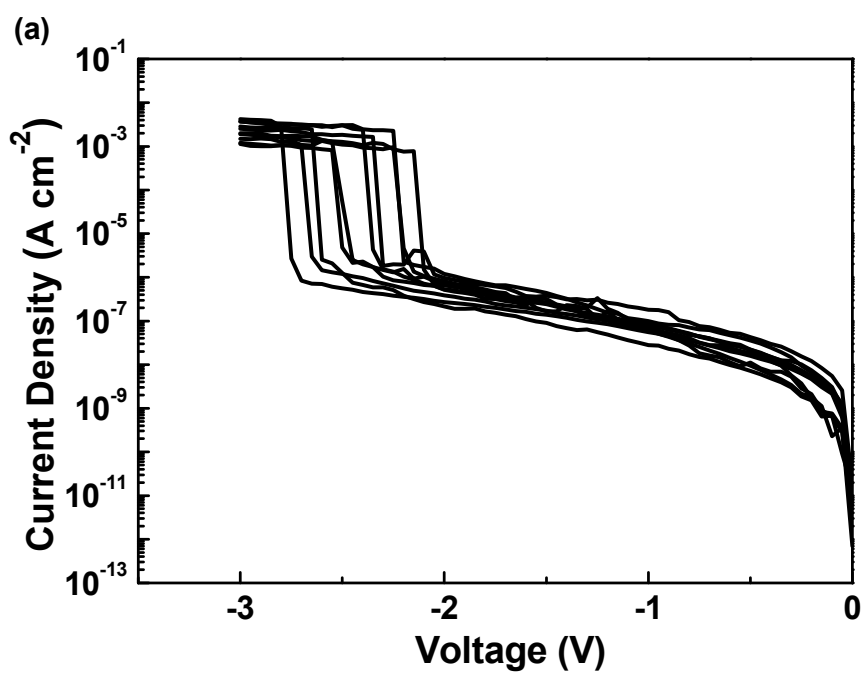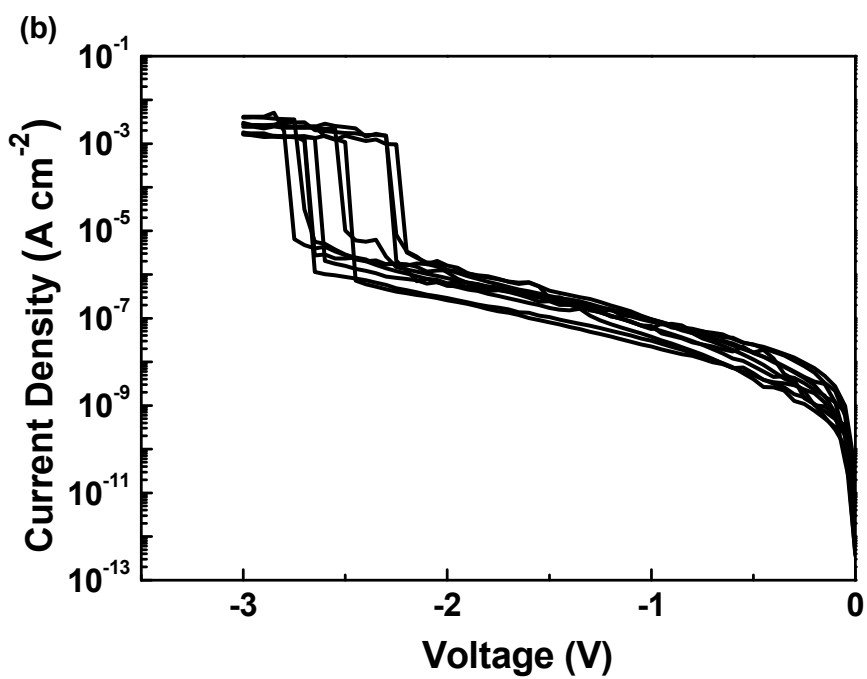

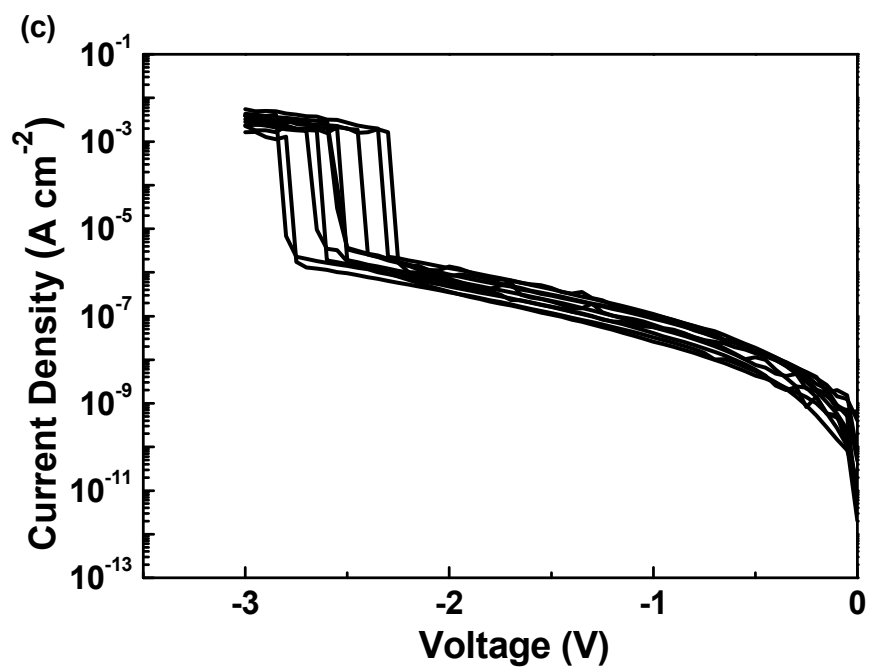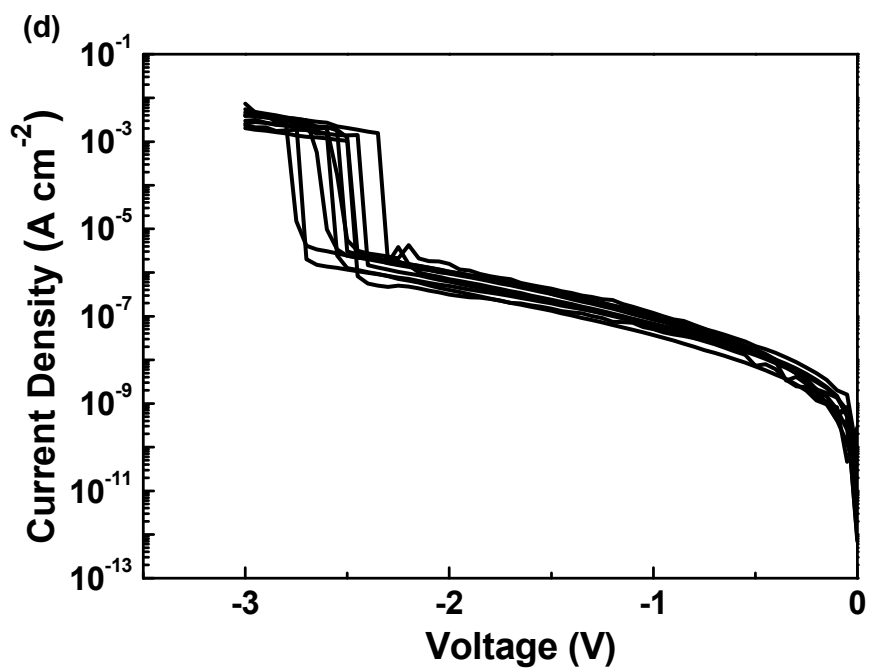

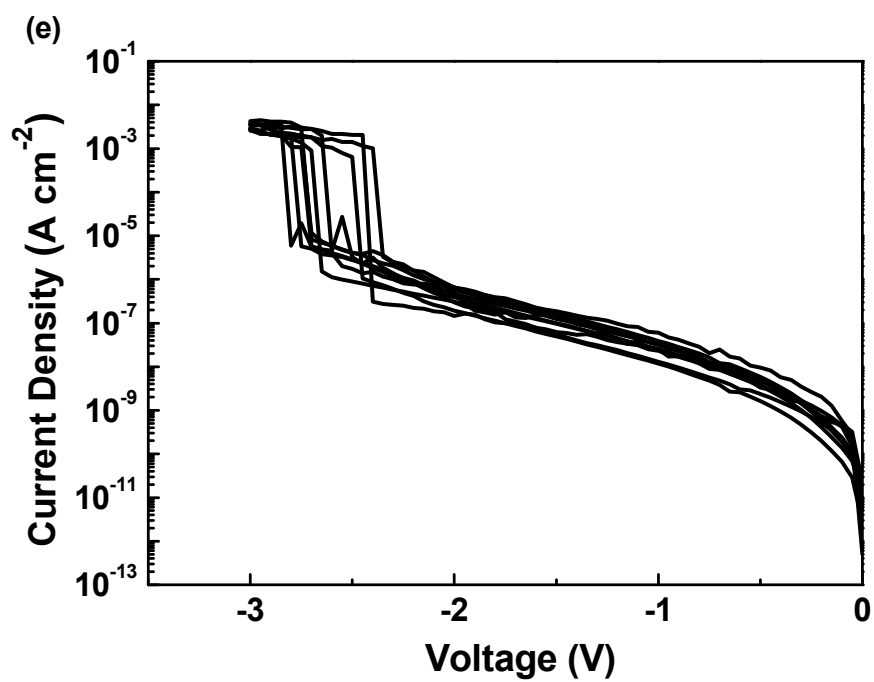

**Fig. S7** Current density-voltage ( $J$ - $V$ ) characteristic of flexible PI(APAP) memory device (in different cells) under (a) a flat condition and bending condition radius of curvature of (b) 30 mm, (c) 20 mm, (d) 10 mm, and (e) 5 mm.

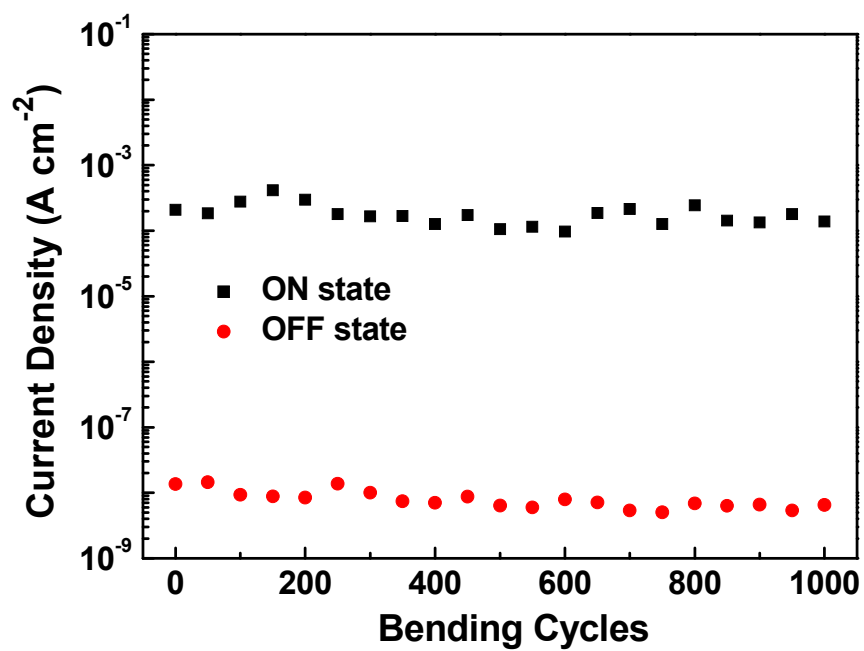

Fig. S8 Mechanical endurance of the flexible PI(AMTPA95-APAP5) memory device.

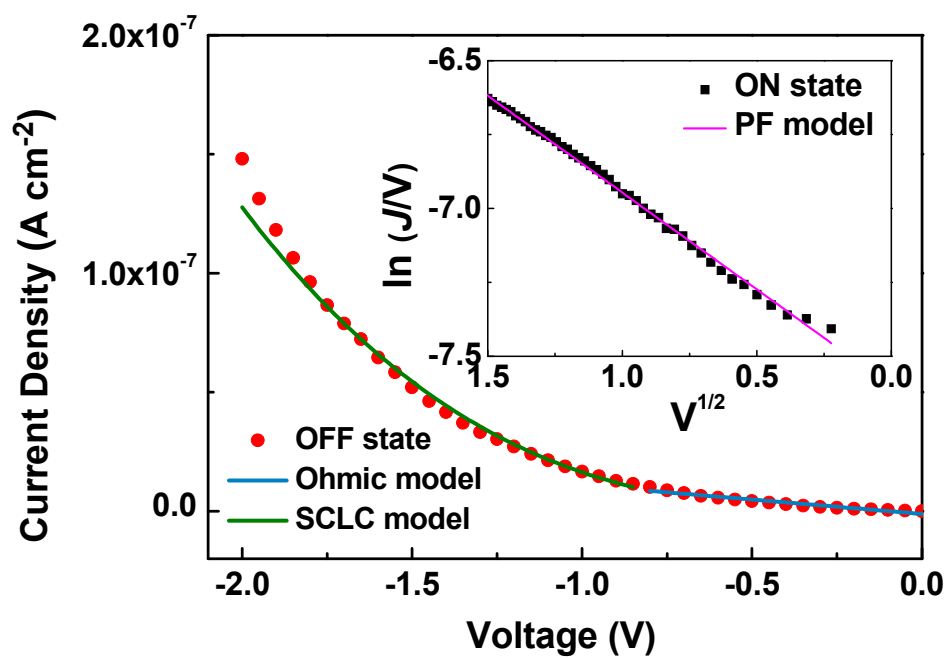

**Fig. S9** Experimental and fitted  $J$ - $V$  characteristics of volatile PI(AMTPA) device in the OFF and ON states.

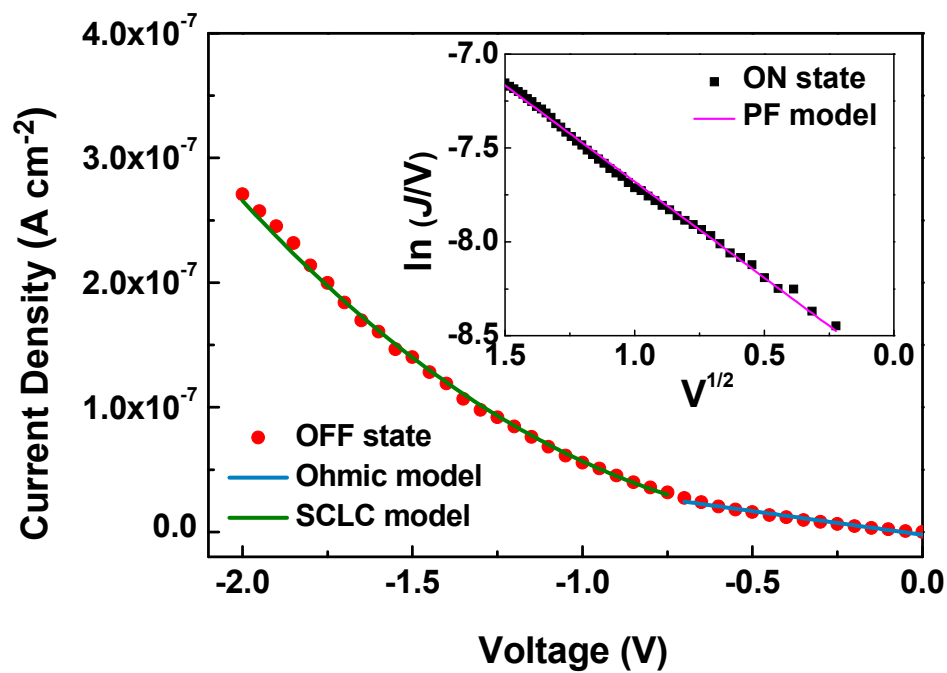

**Fig. S10** Experimental and fitted  $J$ - $V$  characteristics of volatile **PI(APAP)** device in the OFF and ON states.
